# Supplementary material for: Monobutyrin and Monovalerin Affect Brain Short-Chain Fatty Acid Profiles and Tight-Junction Protein Expression in ApoE-Knockout Rats Fed High-Fat Diets
Source: Nutrients. 2020 Apr 24;12(4):1202. doi: 10.3390/nu12041202 (PMC7230324; doi:10.3390/nu12041202)
Supplement: Supplementary file 1 [file nutrients-12-01202-s001.pdf]

# Supplementary material

## Materials and Methods

**Supplementary Table S1.** Composition of experimental diets (g/kg, dry weight basis) given to conventional rats fed a pure high-fat diet (C) or to Apolipoprotein E-knockout (ApoE<sup>-/-</sup>) rats fed a low-fat diet (LF) or high-fat diets (HF), pure or supplemented with 1% monobutylin (MB) or monovalerin (MV) for 5 weeks.

| Ingredients/groups    | C     | HF    | LF    | MB    | MV    |
|-----------------------|-------|-------|-------|-------|-------|
| <b>Macronutrients</b> |       |       |       |       |       |
| <i>Protein</i>        |       |       |       |       |       |
| Casein†               | 150.0 | 150.0 | 150.0 | 150.0 | 150.0 |
| DL-Methionine†        | 1.2   | 1.2   | 1.2   | 1.2   | 1.2   |
| <i>Fat</i>            |       |       |       |       |       |
| Lard                  | 230.0 | 230.0 | -     | 230.0 | 230.0 |
| Rapeseed oil          | -     | -     | 50.0  | -     | -     |
| <i>Carbohydrate</i>   |       |       |       |       |       |
| Wheat starch¶         | 410.8 | 410.8 | 590.8 | 400.8 | 400.8 |
| Sucrose               | 100.0 | 100.0 | 100.0 | 100.0 | 100.0 |
| Cellulose§            | 50.0  | 50.0  | 50.0  | 50.0  | 50.0  |
| <b>Micronutrients</b> |       |       |       |       |       |
| Mineral mixture       | 48.0  | 48.0  | 48.0  | 48.0  | 48.0  |
| Vitamin mixture       | 8.0   | 8.0   | 8.0   | 8.0   | 8.0   |
| Choline chloride†     | 2.0   | 2.0   | 2.0   | 2.0   | 2.0   |
| <b>Supplements</b>    |       |       |       |       |       |
| Monobutylin           | -     | -     | -     | 10.0  | -     |
| Monovalerin           | -     | -     | -     | -     | 10.0  |

MB, monobutylin; MV, monovalerin.

† Sigma-Aldrich, St. Louis, MO, USA

§ FMC BioPolymer, Cork, Ireland

|| Altromin, Lage, Germany, with composition according to the American Institute of Nutrition

¶ Cargill, Sas van Gent, The Netherlands; the amount varied depending on the supplement and fat content of the test diets

## Results

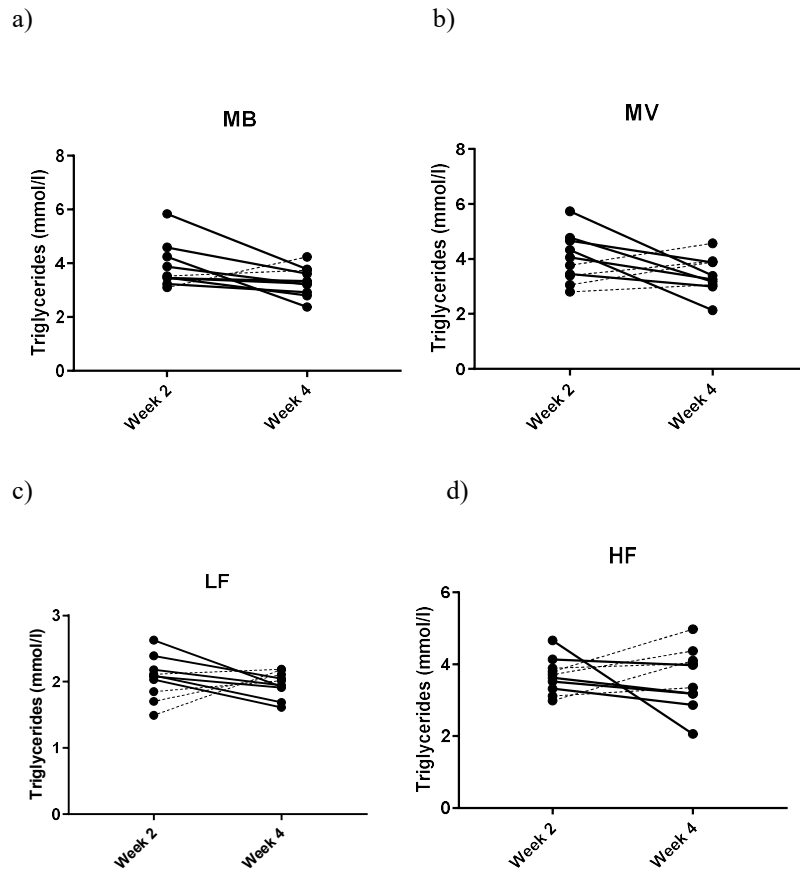

**Figure S1.** Changes in serum triglycerides measured in the tail vein in individual Apolipoprotein E-knockout (ApoE<sup>-/-</sup>) rats fed a low-fat diet (LF) or high-fat diets (HF), pure or supplemented with 1% monobutyrin (MB) or monovalerin (MV) for 5 weeks (n = 10/group). Solid lines indicate decreased changes in triglycerides between week 2 and 4, while dash lines show increased changes. Values are means  $\pm$  SEM. \*  $p < 0.05$ , \*\*\*\*  $p < 0.0001$ .

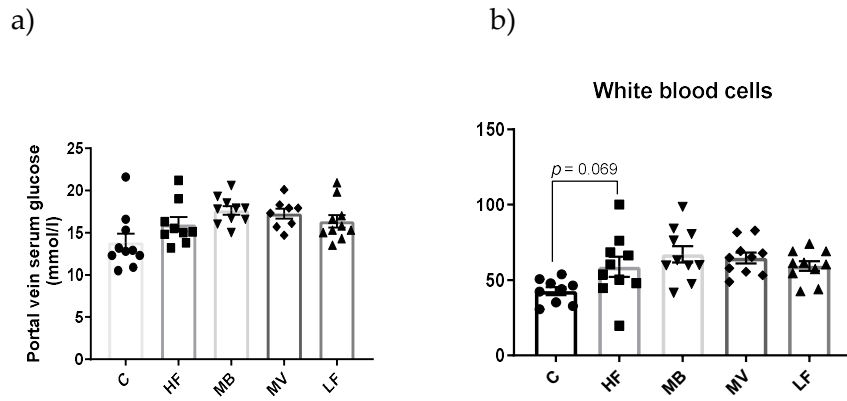

**Figure S2.** Other parameters measured in conventional rats fed a pure high-fat diet (C), or Apolipoprotein E-knockout (ApoE<sup>-/-</sup>) rats fed a low-fat diet (LF) or high-fat diets (HF), pure or supplemented with 1% of monobutyrin (MB) or monovalerin (MV) (n = 10/group) for 5 weeks. (a) Portal vein serum glucose (mmol/L), (b) portal vein white blood cell counts.

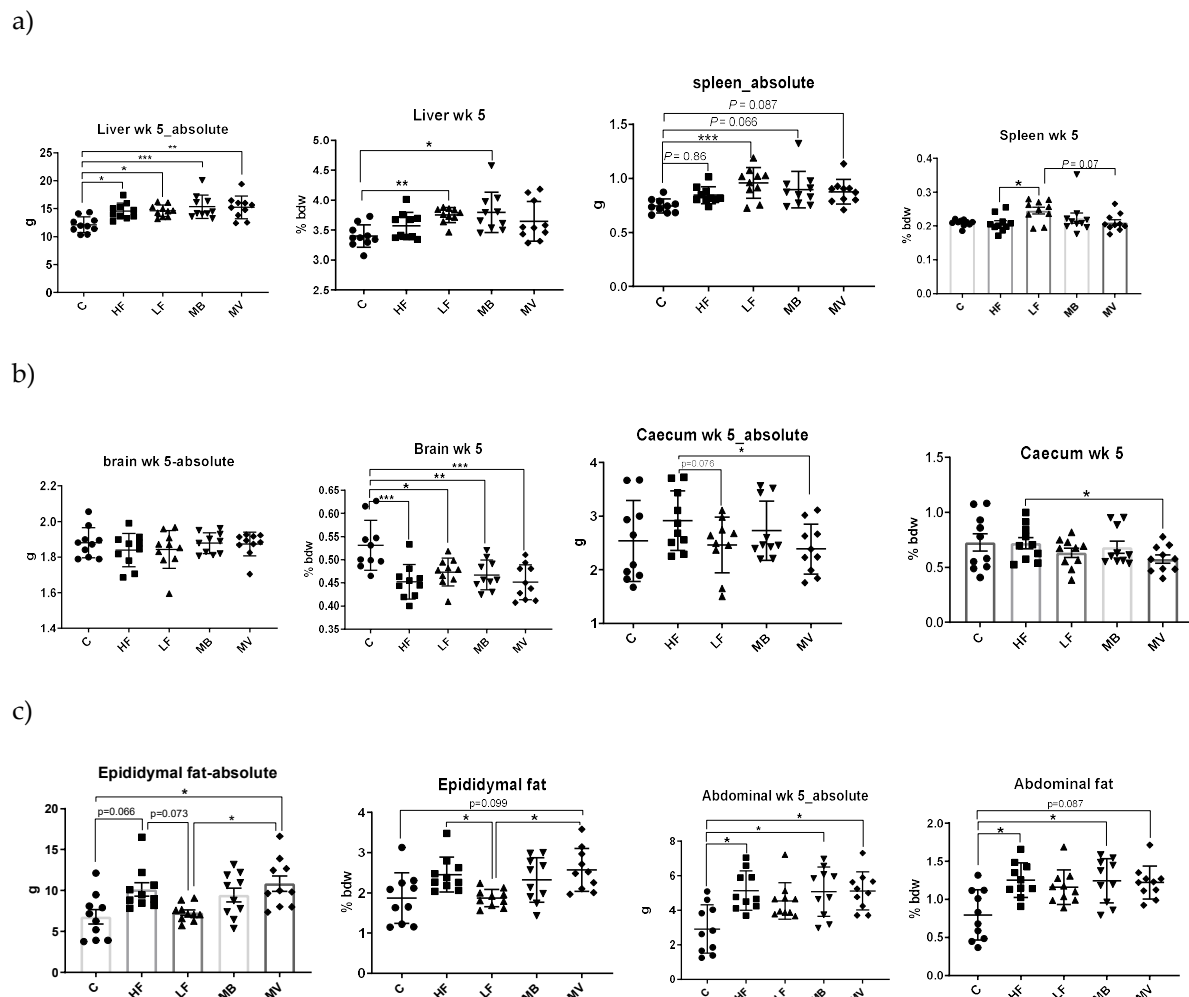

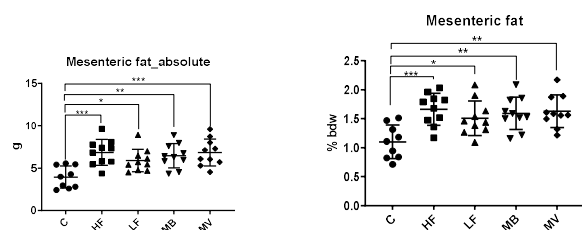

**Figure S3.** Tissue weights in conventional rats fed a pure high-fat diet (C), or Apolipoprotein E-knockout (ApoE<sup>-/-</sup>) rats fed a low-fat diet (LF) or high-fat diets (HF), pure or supplemented with 1% monobutylin (MB) or monovalerin (MV) for 5 weeks (n = 10/group). Significant differences between groups: \*  $p < 0.05$ , \*\*  $p < 0.01$ , \*\*\*  $p < 0.001$ .

## Correlations

Correlations between SCFA and the analysed biomarkers seem to be dynamic and inter-locational (Figure 5b in the manuscript). For instance, in serum, valeric acid, highest in the MV group, was positively associated with acetic and isovaleric acids ( $p = 0.011$  to  $0.002$ ,  $r = 0.39$  to  $0.46$ ), but there was no correlation with butyric acid. In the brain, valeric acid was positively correlated with butyric acid ( $P = 0.002$ ,  $r = 0.48$ ). Isovaleric acid was positively associated with total SCFA ( $p < 0.0001$ ,  $r = 0.57$ ), acetic acid ( $p < 0.0001$ ,  $r = 0.56$ ), and propionic acid ( $p < 0.0001$ ,  $r = 0.78$ ), but negatively related to valeric acid ( $p = 0.049$ ,  $r = -0.32$ ). There were also some correlations between serum and brain; serum valeric acid was conversely correlated with brain butyric ( $p = 0.046$ ,  $r = -0.34$ ) and isovaleric acids ( $p = 0.017$ ,  $r = -0.39$ ).

In the brain, mRNA expression levels of ZO-1 and GPR109A were positively correlated with both butyric ( $p < 0.0001$ ,  $r = 0.78$  and  $p = 0.0005$ ,  $r = 0.72$ ) and valeric acids ( $p = 0.001$ ,  $r = 0.68$  and  $p < 0.0001$ ,  $r = 0.78$ ), while brain occludin was negatively correlated with only brain isovaleric acid ( $p = 0.050$ ,  $r = -0.43$ ).

Aortic plasma IL-1 $\beta$  showed a positive association with brain valeric acid ( $p = 0.025$ ,  $r = 0.43$ ), while brain IL-1 $\beta$  was negatively correlated with serum propionic ( $p = 0.001$ ,  $r = -0.54$ ) and butyric acids ( $p = 0.019$ ,  $r = -0.38$ ) and positively associated with serum ratio of acetic-to-propionic acid ( $p = 0.0005$ ,  $r = 0.053$ ).

Serum HDL-c measured at week 5 was positively correlated with valeric acid in blood ( $p = 0.0046$ ,  $r = 0.41$ ) and brain ( $p = 0.0006$ ,  $r = 0.53$ ). HDL-c was positively correlated with brain expression of GPR109A

( $p = 0.006$ ,  $r = 0.49$ ) and ZO-1 ( $p = 0.026$ ,  $r = 0.41$ ), and inversely related with jejunal expression of occludin ( $p = 0.04$ ,  $r = -0.32$ ).

Lactulose in urine was positively associated with serum acetic acid ( $p = 0.032$ ,  $r = 0.306$ ) and negatively associated with expression of jejunal ZO-1 ( $p = 0.010$ ,  $r = -0.40$ ).

Expression of GPR109A in the jejunum was negatively correlated with serum levels of butyric ( $p = 0.003$ ,  $r = -0.47$ ) and propionic ( $p = 0.028$ ,  $r = -0.36$ ) acids, so positively associated with the ratios of acetic-to-butyric acids ( $p = 0.004$ ,  $r = 0.46$ ) and acetic-to-propionic acids ( $p = 0.015$ ,  $r = 0.40$ ).
